# Supplementary material
Source: PubMed Central journal article supplement (PMC3608829)
Supplement: NIHMS438023-supplement-01.pdf [file NIHMS438023-supplement-01.pdf]

Table S1. Integration site datasets used in this study.

| SetName                                     | Target cells             | Total Aligned Sequences | Unique Sites |
|---------------------------------------------|--------------------------|-------------------------|--------------|
| Male-HIV-HeLa-CBXLEDGF-Mse-AluComparison    | CBX1-LEDGF 325-530       | 1072                    | 816          |
| Male-HIV-HeLa-CBXLEDGF-Tsp-AluComparison    | CBX1-LEDGF 325-530       | 528                     | 404          |
| Male-HIV-HeLa-CBXLEDGFmut-Mse-AluComparison | CBX1-LEDGF 325-530 D366N | 1858                    | 1329         |
| Male-HIV-HeLa-CBXLEDGFmut-Tsp-AluComparison | CBX1-LEDGF 325-530 D366N | 1903                    | 1359         |
| Male-HIV-HeLa-LEDGFbc-Mse-AluComparison     | LEDGF BC                 | 1893                    | 1364         |
| Male-HIV-HeLa-LEDGFbc-Tsp-AluComparison     | LEDGF BC                 | 1554                    | 866          |
| Male-HIV-HeLa-LEDGFkd-Mse-AluComparison     | LEDGF KD                 | 1517                    | 365          |
| Male-HIV-HeLa-LEDGFkd-Tsp-AluComparison     | LEDGF KD                 | 1511                    | 1194         |
| Male-HIV-HeLa-WT-Mse-AluComparison          | WT LEDGF                 | 1311                    | 1098         |
| Male-HIV-HeLa-WT-Tsp-AluComparison          | WT LEDGF                 | 1684                    | 1375         |
