# Supplementary material
Source: PubMed Central journal article supplement (PMC3608829)
Supplement: NIHMS438023-supplement-02.pdf [file NIHMS438023-supplement-02.pdf]

**Table S2 - Oligonucleotides used in this study**

| <b>Oligonucleotide Sequence (5'→3')</b>                         | <b>Description</b>                                       |
|-----------------------------------------------------------------|----------------------------------------------------------|
| GTAATACGACTCACTATAGGGCTCCGCTTAAGGGAC                            | Linker+                                                  |
| [Phosp]TAGTCCCTTAAGCGGAG-[AmC7-Q]                               | Mse linker-                                              |
| [Phosp]AATTGTCCCTTAAGCGGAG-[AmC7-Q]                             | Tsp linker-                                              |
| GTAATACGACTCACTATAGGGC                                          | linker primer, PCR1                                      |
| CTTAAGCCTCAATAAAGCTTGCCTTGAG                                    | HIV LTR primer, PCR1                                     |
| <b>gcctccctcgcgccatcag</b> CACTATAGGGCTCCGCTTAAGGGAC            | linker primer, PCR2, fused to <b>Primer A</b>            |
| <b>gccttgccagcccgctcag</b> -BARCODE-AGACCCTTTTAGTCAGTGTGGAAAATC | HIV LTR primer, PCR2. <b>PrimerB</b> -BARCODE-LTR primer |
| GCCTCCCAAAGTGCTGGGATTACAG                                       | Alu Forward                                              |
| GCTCTCGCACCCATCTCTCTCC                                          | HIV Gag Reverse                                          |
| FAM-GCGAGTGCCCGTCTGTTGTGTGACTCTGGTAACTAGCTCGC-Dabcyl            | LTR Probe                                                |
| TGTGTGCCCGTCTGTTGTGT                                            | MH531 late RT forward                                    |
| GAGTCCTGCGTCGAGAGAGC                                            | MH532 late RT reverse                                    |
| FAM-CAGTGGCGCCCGAACAGGGA-TAMRA                                  | LRT-P late RT probe                                      |
